# Supplementary material
Source: Elsevier journal article supplement (https://www.sciencedirect.com/science/article/pii/S2603647918300149)
Supplement: mmc1 [file S2603647918300149:mmc1.doc]

Table 1; online. Consistency and construction validity of this questionnaire

| **Item / Dimension** | **Efficiency** | **Fulfilment** | **Tutorials** | **Resources** | **Responsibility** | **Infrastructure** |
| --- | --- | --- | --- | --- | --- | --- |
| Theoretical teaching of traumatology received | 0.75 |  |  |  |  |  |
| Traumatology faculty maintain comparable teaching and care levels | 0.73 |  |  |  |  |  |
| Perception of traumatology faculty | 0.62 |  |  |  |  |  |
| Upon completion of the rotation, you had become aware of your knowledge of traumatology | 0.54 |  |  |  |  |  |
| Relationship maintained with traumatology faculty | 0.50 |  |  |  |  |  |
| Level of course demands | 0.31 |  |  |  |  |  |
| Course examinations are written clearly and precisely |  | 0.80 |  |  |  |  |
| Course examinations matched the education received, theoretical and practical portions alike |  | 0.79 |  |  |  |  |
| Degree of program fulfilment |  | 0.67 |  |  |  |  |
| Do you consider external assistance necessary for passing the course? |  |  | 0.90 |  |  |  |
| Use of tutorials |  |  | 0.71 |  |  |  |
| What is your opinion about the level of equipment and use of audiovisual media to support teaching traumatology? |  |  |  | 0.81 |  |  |
|  |  |  |  |  |  |  |
| Do you consider elective courses to be useful for teaching the locomotor system? |  |  |  | 0.61 |  |  |
| Do you consider the documentation for following the course and taking the exams to be adequate? |  |  |  |  | 0.84 |  |
| Did you regularly attend classes? |  |  |  |  | 0.46 |  |
| You consider that the infrastructure where the theoretical and practical teaching is conducted is adequate. |  |  |  |  |  | 0.82 |
| The bibliographic resources available in the library are sufficient for course study. |  |  |  |  |  | 0.65 |

Factor Loadings as score
